# Supplementary material
Source: MDPI journal article supplement (https://www.mdpi.com/2673-8783/2/4/14)
Supplement: s1 [file s1]

## Supplementary Materials

**Table S1.** Properties of poultry litter used for biochar production. Values are means  $\pm$  standard deviation (n=3).

| Properties                                | Value                        |                                      |
|-------------------------------------------|------------------------------|--------------------------------------|
| Moisture (%)                              | 30.2 ± 0.67                  |                                      |
| pH-H <sub>2</sub> O                       | 8.49 ± 0.02                  |                                      |
| EC (mS cm <sup>-1</sup> ) <sup>1</sup>    | 6.74 ± 0.11                  |                                      |
| Bulk density (g cm <sup>-3</sup> )        | 0.42 ± 0.01                  |                                      |
| WHC (g g <sup>-1</sup> )                  | 1.95 ± 0.02                  |                                      |
| Hydrophobicity class                      | Slightly hydrophobic         |                                      |
| C (%) <sup>2</sup>                        | 46.3 ± 0.6                   |                                      |
| N (%)                                     | 3.54 ± 0.08                  |                                      |
| C:N ratio                                 | 13.09 ± 0.28                 |                                      |
| NO <sub>3</sub> -N (mg kg <sup>-1</sup> ) | 5.44 ± 0.09                  |                                      |
| NH <sub>4</sub> -N (g kg <sup>-1</sup> )  | 2.630 ± 0.033                |                                      |
| SRP (g kg <sup>-1</sup> )                 | 0.929 ± 0.035                |                                      |
| Elemental composition                     | Total (mg kg <sup>-1</sup> ) | Water soluble (mg kg <sup>-1</sup> ) |
| Al                                        | 587 ± 67                     | 42.18 ± 1.1                          |
| As                                        | 1.3 ± 0.28                   | 0.55 ± 0.01                          |
| Ca                                        | 21500 ± 350                  | 467.62 ± 13.54                       |
| Cd                                        | 0.30 ± 0.00                  | BDL                                  |
| Co                                        | 0.93 ± 0.06                  | 0.37 ± 0.01                          |
| Cr                                        | 5.42 ± 0.4                   | 0.78 ± 0.03                          |
| Cu                                        | 637 ± 49                     | 262.2 ± 17.62                        |
| Fe                                        | 163 ± 63                     | 118.55 ± 5.46                        |
| K                                         | 32983 ± 1484                 | 22064 ± 525                          |
| Mg                                        | 6617 ± 252                   | 323.82 ± 12.59                       |
| Mn                                        | 442 ± 22                     | 11.72 ± 0.31                         |
| Mo                                        | 3.65 ± 0.48                  | 1.57 ± 0.06                          |
| Na                                        | 6867 ± 451                   | 4585 ± 50                            |
| Ni                                        | 8.83 ± 0.35                  | 6.17 ± 0.11                          |
| P                                         | 16317 ± 681                  | 1290 ± 9                             |
| Pb                                        | 0.73 ± 0.19                  | BDL                                  |
| S                                         | 5483 ± 153                   | 3252 ± 110                           |
| Se                                        | 1.75 ± 0.23                  | 0.42 ± 0.02                          |
| Ti                                        | 0.38 ± 0.19                  | 0.62 ± 0.06                          |
| Zn                                        | 680 ± 40                     | 66 ± 1.14                            |

<sup>1</sup> EC, electrical conductivity; WHC, water holding capacity at -33KPa; NO<sub>3</sub>-N, nitrate nitrogen; NH<sub>4</sub>-N, ammonium nitrogen; SRP, soluble reactive phosphorus; BDL, below detection limit.

<sup>2</sup> All concentrations of all nutrients and elements are on dry-weight basis.
